# Supplementary material for: Novel protein markers of androgen activity in humans: proteomic study of plasma from young chemically castrated men
Source: eLife journal article supplement (doi:10.7554/elife.74638), 2022-03-01
Supplement: supp [file elife-74638-supp-v1.zip]

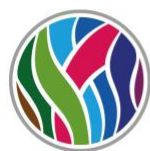

## **eLife's transparent reporting form**

We encourage authors to provide detailed information *within their submission* to facilitate the interpretation and replication of experiments. Authors can upload supporting documentation to indicate the use of appropriate reporting guidelines for health-related research (see [EQUATOR Network](#)), life science research (see the [BioSharing Information Resource](#)), or the [ARRIVE guidelines](#) for reporting work involving animal research. Where applicable, authors should refer to any relevant reporting standards documents in this form.

If you have any questions, please consult our Journal Policies and/or contact us: [editorial@elifesciences.org](mailto:editorial@elifesciences.org).

### **Sample-size estimation**

- You should state whether an appropriate sample size was computed when the study was being designed
- You should state the statistical method of sample size computation and any required assumptions
- If no explicit power analysis was used, you should describe how you decided what sample (replicate) size (number) to use

Please outline where this information can be found within the submission (e.g., sections or figure legends), or explain why this information doesn't apply to your submission:

In discussion-as limitations, we added the reasons why we do not perform power calculations.

### **Replicates**

- You should report how often each experiment was performed
- You should include a definition of biological versus technical replication
- The data obtained should be provided and sufficient information should be provided to indicate the number of independent biological and/or technical replicates
- If you encountered any outliers, you should describe how these were handled
- Criteria for exclusion/inclusion of data should be clearly stated
- High-throughput sequence data should be uploaded before submission, with a private link for reviewers provided (these are available from both GEO and ArrayExpress)

Please outline where this information can be found within the submission (e.g., sections or figure legends), or explain why this information doesn't apply to your submission:



All categories of Replication and experiments performing are explained in details in: Subjects and Methods-Subjects and SUPPLEMENTARY MATERIAL- Supplementary method- Proteomics experiments.

The outliers detection-and exclusion/inclusion are described in: Subjects and Methods-Subjects.

Submission details:

Project Name: Novel potentially clinically valuable protein markers of androgen activity in humans

Project accession: PXD024448 (Included in section 'Data availability')

Project DOI: Not applicable

Reviewer account details:

Username: reviewer\_pxd024448@ebi.ac.uk

Password: vTDKecnJ

**Statistical reporting**

- Statistical analysis methods should be described and justified
- Raw data should be presented in figures whenever informative to do so (typically when N per group is less than 10)
- For each experiment, you should identify the statistical tests used, exact values of N, definitions of center, methods of multiple test correction, and dispersion and precision measures (e.g., mean, median, SD, SEM, confidence intervals; and, for the major substantive results, a measure of effect size (e.g., Pearson's r, Cohen's d)
- Report exact p-values wherever possible alongside the summary statistics and 95% confidence intervals. These should be reported for all key questions and not only when the p-value is less than 0.05.

Please outline where this information can be found within the submission (e.g., sections or figure legends), or explain why this information doesn't apply to your submission:

-Statistical analysis methods were described in section named 'Statistical analysis' and in Supplementary file 2. In these sections the statistical tests used were specified and exact values of N, p-value and precision measures were reported in the Results section and included in the Figures, Tables and supplementary info.

(For large datasets, or papers with a very large number of statistical tests, you may upload a single table file with tests, Ns, etc., with reference to sections in the manuscript.)

**Group allocation**

- Indicate how samples were allocated into experimental groups (in the case of clinical studies, please specify allocation to treatment method); if randomization was used, please also state if restricted randomization was applied
- Indicate if masking was used during group allocation, data collection and/or data analysis

Please outline where this information can be found within the submission (e.g., sections or figure legends), or explain why this information doesn't apply to your submission:

Pages 6-9. No masking/allocation was applied since all subjects received same pharmacological intervention.

**Additional data files ("source data")**

- We encourage you to upload relevant additional data files, such as numerical data that are represented as a graph in a figure, or as a summary table
- Where provided, these should be in the most useful format, and they can be uploaded as "Source data" files linked to a main figure or table
- Include model definition files including the full list of parameters used
- Include code used for data analysis (e.g., R, MatLab)
- Avoid stating that data files are "available upon request"

Please indicate the figures or tables for which source data files have been provided:

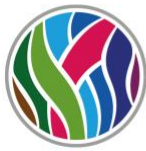

All necessary data for figures is included in the excel file as supplementary materials.

- Figure 2a (data source: Table S3)
- Figure 2b (data source: Table S4)
- Figure 2c (data source: Table S3)
- Figure 3a (data source: Table S5)
- Figure 3b (data source: Table S5)
- Figure 4 (data source: Table S5)
- Figure 5 (data source: Table S5)

R codes can be found on:

[https://github.com/indirapla/TP1\\_proteins\\_marker\\_of\\_androgen\\_activity](https://github.com/indirapla/TP1_proteins_marker_of_androgen_activity)
